# Supplementary material for: PYK2 promotes HER2-positive breast cancer invasion
Source: J Exp Clin Cancer Res. 2019 May 22;38:210. doi: 10.1186/s13046-019-1221-0 (PMC6532260; doi:10.1186/s13046-019-1221-0)
Supplement: Supplementary file 4 — Data S1. Statistical values for Fig. 1a, b, c and d. (XLSX 41 kb) [file 13046_2019_1221_MOESM4_ESM.xlsx]

## Sheet: Sheet1
Apoptosis 24 h
Within each row, compare columns (simple effects within rows)
Number of families	5
Number of comparisons per family	11
Alpha	0.05
Dunnett's multiple comparisons test	Mean Diff.	95.00% CI of diff.	Significant?	Summary	Adjusted P Value
BT-474
0 vs. 0.01	17.17	-4.792 to 39.14	No	ns	0.2053
0 vs. 0.05	12.58	-9.388 to 34.54	No	ns	0.5535
0 vs. 0.1	14.43	-7.535 to 36.4	No	ns	0.3887
0 vs. 0.5	9.55	-12.42 to 31.52	No	ns	0.8332
0 vs. 1	8.83	-13.14 to 30.8	No	ns	0.8854
0 vs. 2	-1.33	-23.3 to 20.64	No	ns	0.9998
0 vs. 5	-0.14	-22.11 to 21.83	No	ns	0.9999
0 vs. 10	-1.23	-23.2 to 20.74	No	ns	0.9998
0 vs. 15	-4.733	-26.7 to 17.23	No	ns	0.999
0 vs. 20	-7.6	-29.57 to 14.37	No	ns	0.9504
0 vs. 25	-12.99	-34.96 to 8.972	No	ns	0.5142
MCF-7
0 vs. 0.01	7.58	-14.39 to 29.55	No	ns	0.9512
0 vs. 0.05	7.76	-14.21 to 29.73	No	ns	0.9438
0 vs. 0.1	3.813	-18.15 to 25.78	No	ns	0.9993
0 vs. 0.5	-1.057	-23.02 to 20.91	No	ns	0.9998
0 vs. 1	-7.2	-29.17 to 14.77	No	ns	0.9647
0 vs. 2	-9.887	-31.85 to 12.08	No	ns	0.8056
0 vs. 5	-4.327	-26.29 to 17.64	No	ns	0.9991
0 vs. 10	-8.49	-30.46 to 13.48	No	ns	0.9064
0 vs. 15	-11.57	-33.54 to 10.4	No	ns	0.6504
0 vs. 20	-15.67	-37.64 to 6.295	No	ns	0.2961
0 vs. 25	-20.34	-42.3 to 1.628	No	ns	0.0841
MDA-MB-231
0 vs. 0.01	8.61	-13.36 to 30.58	No	ns	0.8992
0 vs. 0.05	13.94	-8.028 to 35.9	No	ns	0.4299
0 vs. 0.1	11.96	-10.01 to 33.92	No	ns	0.613
0 vs. 0.5	12.05	-9.918 to 34.01	No	ns	0.6042
0 vs. 1	10.79	-11.17 to 32.76	No	ns	0.7244
0 vs. 2	5.397	-16.57 to 27.36	No	ns	0.993
0 vs. 5	-29.48	-51.44 to -7.512	Yes	**	0.0028
0 vs. 10	-55.12	-77.09 to -33.16	Yes	****	0.0001
0 vs. 15	-69.11	-91.08 to -47.14	Yes	****	0.0001
0 vs. 20	-78.69	-100.7 to -56.72	Yes	****	0.0001
0 vs. 25	-73.11	-95.07 to -51.14	Yes	****	0.0001
MDA-MB-468
0 vs. 0.01	15.57	-6.398 to 37.53	No	ns	0.3033
0 vs. 0.05	17.01	-4.955 to 38.98	No	ns	0.2139
0 vs. 0.1	15.13	-6.835 to 37.1	No	ns	0.3345
0 vs. 0.5	15.26	-6.702 to 37.23	No	ns	0.3247
0 vs. 1	5.857	-16.11 to 27.82	No	ns	0.9908
0 vs. 2	-24.74	-46.71 to -2.778	Yes	*	0.0188
0 vs. 5	-50.17	-72.14 to -28.21	Yes	****	0.0001
0 vs. 10	-52.06	-74.03 to -30.1	Yes	****	0.0001
0 vs. 15	-50.85	-72.82 to -28.88	Yes	****	0.0001
0 vs. 20	-50.45	-72.41 to -28.48	Yes	****	0.0001
0 vs. 25	-46.84	-68.8 to -24.87	Yes	****	0.0001
SKBR3
0 vs. 0.01	14.51	-7.452 to 36.48	No	ns	0.3821
0 vs. 0.05	11.1	-10.86 to 33.07	No	ns	0.6953
0 vs. 0.1	7.55	-14.42 to 29.52	No	ns	0.9524
0 vs. 0.5	5.327	-16.64 to 27.29	No	ns	0.9935
0 vs. 1	1.64	-20.33 to 23.61	No	ns	0.9997
0 vs. 2	-4.413	-26.38 to 17.55	No	ns	0.9991
0 vs. 5	4.09	-17.88 to 26.06	No	ns	0.9992
0 vs. 10	6.91	-15.06 to 28.88	No	ns	0.9731
0 vs. 15	7.533	-14.43 to 29.5	No	ns	0.953
0 vs. 20	4.787	-17.18 to 26.75	No	ns	0.999
0 vs. 25	1.413	-20.55 to 23.38	No	ns	0.9997
Test details	Mean 1	Mean 2	Mean Diff.	SE of diff.	N1	N2	q	DF
BT-474
0 vs. 0.01	24.58	7.41	17.17	7.884	3	3	2.178	120
0 vs. 0.05	24.58	12.01	12.58	7.884	3	3	1.595	120
0 vs. 0.1	24.58	10.15	14.43	7.884	3	3	1.83	120
0 vs. 0.5	24.58	15.03	9.55	7.884	3	3	1.211	120
0 vs. 1	24.58	15.75	8.83	7.884	3	3	1.12	120
0 vs. 2	24.58	25.91	-1.33	7.884	3	3	0.1687	120
0 vs. 5	24.58	24.72	-0.14	7.884	3	3	0.01776	120
0 vs. 10	24.58	25.81	-1.23	7.884	3	3	0.156	120
0 vs. 15	24.58	29.32	-4.733	7.884	3	3	0.6004	120
0 vs. 20	24.58	32.18	-7.6	7.884	3	3	0.964	120
0 vs. 25	24.58	37.58	-12.99	7.884	3	3	1.648	120
MCF-7
0 vs. 0.01	24.69	17.11	7.58	7.884	3	3	0.9615	120
0 vs. 0.05	24.69	16.93	7.76	7.884	3	3	0.9843	120
0 vs. 0.1	24.69	20.88	3.813	7.884	3	3	0.4837	120
0 vs. 0.5	24.69	25.75	-1.057	7.884	3	3	0.134	120
0 vs. 1	24.69	31.89	-7.2	7.884	3	3	0.9133	120
0 vs. 2	24.69	34.58	-9.887	7.884	3	3	1.254	120
0 vs. 5	24.69	29.02	-4.327	7.884	3	3	0.5488	120
0 vs. 10	24.69	33.18	-8.49	7.884	3	3	1.077	120
0 vs. 15	24.69	36.26	-11.57	7.884	3	3	1.468	120
0 vs. 20	24.69	40.36	-15.67	7.884	3	3	1.988	120
0 vs. 25	24.69	45.03	-20.34	7.884	3	3	2.58	120
MDA-MB-231
0 vs. 0.01	16.31	7.7	8.61	7.884	3	3	1.092	120
0 vs. 0.05	16.31	2.373	13.94	7.884	3	3	1.768	120
0 vs. 0.1	16.31	4.353	11.96	7.884	3	3	1.517	120
0 vs. 0.5	16.31	4.263	12.05	7.884	3	3	1.528	120
0 vs. 1	16.31	5.517	10.79	7.884	3	3	1.369	120
0 vs. 2	16.31	10.91	5.397	7.884	3	3	0.6846	120
0 vs. 5	16.31	45.79	-29.48	7.884	3	3	3.739	120
0 vs. 10	16.31	71.43	-55.12	7.884	3	3	6.992	120
0 vs. 15	16.31	85.42	-69.11	7.884	3	3	8.766	120
0 vs. 20	16.31	95	-78.69	7.884	3	3	9.981	120
0 vs. 25	16.31	89.42	-73.11	7.884	3	3	9.273	120
MDA-MB-468
0 vs. 0.01	31.59	16.03	15.57	7.884	3	3	1.975	120
0 vs. 0.05	31.59	14.58	17.01	7.884	3	3	2.158	120
0 vs. 0.1	31.59	16.46	15.13	7.884	3	3	1.919	120
0 vs. 0.5	31.59	16.33	15.26	7.884	3	3	1.936	120
0 vs. 1	31.59	25.74	5.857	7.884	3	3	0.7429	120
0 vs. 2	31.59	56.34	-24.74	7.884	3	3	3.139	120
0 vs. 5	31.59	81.77	-50.17	7.884	3	3	6.364	120
0 vs. 10	31.59	83.66	-52.06	7.884	3	3	6.604	120
0 vs. 15	31.59	82.44	-50.85	7.884	3	3	6.45	120
0 vs. 20	31.59	82.04	-50.45	7.884	3	3	6.399	120
0 vs. 25	31.59	78.43	-46.84	7.884	3	3	5.941	120
SKBR3
0 vs. 0.01	25.69	11.18	14.51	7.884	3	3	1.841	120
0 vs. 0.05	25.69	14.59	11.1	7.884	3	3	1.408	120
0 vs. 0.1	25.69	18.14	7.55	7.884	3	3	0.9577	120
0 vs. 0.5	25.69	20.37	5.327	7.884	3	3	0.6757	120
0 vs. 1	25.69	24.05	1.64	7.884	3	3	0.208	120
0 vs. 2	25.69	30.11	-4.413	7.884	3	3	0.5598	120
0 vs. 5	25.69	21.6	4.09	7.884	3	3	0.5188	120
0 vs. 10	25.69	18.78	6.91	7.884	3	3	0.8765	120
0 vs. 15	25.69	18.16	7.533	7.884	3	3	0.9556	120
0 vs. 20	25.69	20.91	4.787	7.884	3	3	0.6072	120
0 vs. 25	25.69	24.28	1.413	7.884	3	3	0.1793	120

## Sheet: Sheet2
Apoptosis 48 h
Within each row, compare columns (simple effects within rows)
Number of families	5
Number of comparisons per family	11
Alpha	0.05
Dunnett's multiple comparisons test	Mean Diff.	95.00% CI of diff.	Significant?	Summary	Adjusted P Value
BT-474
0 vs. 0.01	13.6	-3.376 to 30.57	No	ns	0.1789
0 vs. 0.05	13.21	-3.761 to 30.18	No	ns	0.2033
0 vs. 0.1	11.94	-5.031 to 28.91	No	ns	0.3018
0 vs. 0.5	11.76	-5.211 to 28.73	No	ns	0.318
0 vs. 1	6.87	-10.1 to 23.84	No	ns	0.8696
0 vs. 2	7.125	-9.846 to 24.1	No	ns	0.8456
0 vs. 5	10.4	-6.576 to 27.37	No	ns	0.459
0 vs. 10	6.145	-10.83 to 23.12	No	ns	0.9269
0 vs. 15	4.84	-12.13 to 21.81	No	ns	0.9845
0 vs. 20	3.235	-13.74 to 20.21	No	ns	0.9992
0 vs. 25	-2.31	-19.28 to 14.66	No	ns	0.9994
MCF-7
0 vs. 0.01	9.7	-7.271 to 26.67	No	ns	0.5408
0 vs. 0.05	7.505	-9.466 to 24.48	No	ns	0.8061
0 vs. 0.1	13.85	-3.121 to 30.82	No	ns	0.164
0 vs. 0.5	7.73	-9.241 to 24.7	No	ns	0.7811
0 vs. 1	13.55	-3.426 to 30.52	No	ns	0.1819
0 vs. 2	10.49	-6.486 to 27.46	No	ns	0.4487
0 vs. 5	8.435	-8.536 to 25.41	No	ns	0.6975
0 vs. 10	4.03	-12.94 to 21	No	ns	0.9933
0 vs. 15	-0.4	-17.37 to 16.57	No	ns	0.9999
0 vs. 20	-4.735	-21.71 to 12.24	No	ns	0.9871
0 vs. 25	-5.37	-22.34 to 11.6	No	ns	0.9674
MDA-MB-231
0 vs. 0.01	-6.525	-23.5 to 10.45	No	ns	0.8991
0 vs. 0.05	-4.005	-20.98 to 12.97	No	ns	0.9936
0 vs. 0.1	-0.555	-17.53 to 16.42	No	ns	0.9999
0 vs. 0.5	-2.2	-19.17 to 14.77	No	ns	0.9995
0 vs. 1	-2.155	-19.13 to 14.82	No	ns	0.9995
0 vs. 2	-22.61	-39.58 to -5.639	Yes	**	0.0035
0 vs. 5	-18.31	-35.28 to -1.339	Yes	*	0.0281
0 vs. 10	-38.24	-55.21 to -21.27	Yes	****	0.0001
0 vs. 15	-48.37	-65.34 to -31.39	Yes	****	0.0001
0 vs. 20	-64.43	-81.4 to -47.45	Yes	****	0.0001
0 vs. 25	-58.95	-75.92 to -41.97	Yes	****	0.0001
MDA-MB-468
0 vs. 0.01	9.865	-7.106 to 26.84	No	ns	0.5207
0 vs. 0.05	5.93	-11.04 to 22.9	No	ns	0.9403
0 vs. 0.1	5.88	-11.09 to 22.85	No	ns	0.9431
0 vs. 0.5	6.365	-10.61 to 23.34	No	ns	0.9114
0 vs. 1	2.69	-14.28 to 19.66	No	ns	0.9993
0 vs. 2	-29.04	-46.01 to -12.07	Yes	***	0.0001
0 vs. 5	-35.02	-51.99 to -18.04	Yes	****	0.0001
0 vs. 10	-52.59	-69.56 to -35.61	Yes	****	0.0001
0 vs. 15	-53.48	-70.45 to -36.5	Yes	****	0.0001
0 vs. 20	-55.96	-72.93 to -38.99	Yes	****	0.0001
0 vs. 25	-45.19	-62.16 to -28.22	Yes	****	0.0001
SKBR3
0 vs. 0.01	16.68	-0.2912 to 33.65	No	ns	0.0564
0 vs. 0.05	16.6	-0.3762 to 33.57	No	ns	0.0583
0 vs. 0.1	16.29	-0.6862 to 33.26	No	ns	0.0661
0 vs. 0.5	15.28	-1.691 to 32.25	No	ns	0.0979
0 vs. 1	13.96	-3.016 to 30.93	No	ns	0.1581
0 vs. 2	-2.98	-19.95 to 13.99	No	ns	0.9993
0 vs. 5	6.47	-10.5 to 23.44	No	ns	0.9035
0 vs. 10	12.59	-4.386 to 29.56	No	ns	0.2483
0 vs. 15	11.89	-5.086 to 28.86	No	ns	0.3067
0 vs. 20	12.09	-4.881 to 29.06	No	ns	0.2886
0 vs. 25	12.08	-4.896 to 29.05	No	ns	0.29
Test details	Mean 1	Mean 2	Mean Diff.	SE of diff.	N1	N2	q	DF
BT-474
0 vs. 0.01	18.63	5.035	13.6	5.997	2	2	2.267	60
0 vs. 0.05	18.63	5.42	13.21	5.997	2	2	2.203	60
0 vs. 0.1	18.63	6.69	11.94	5.997	2	2	1.991	60
0 vs. 0.5	18.63	6.87	11.76	5.997	2	2	1.961	60
0 vs. 1	18.63	11.76	6.87	5.997	2	2	1.146	60
0 vs. 2	18.63	11.51	7.125	5.997	2	2	1.188	60
0 vs. 5	18.63	8.235	10.4	5.997	2	2	1.733	60
0 vs. 10	18.63	12.49	6.145	5.997	2	2	1.025	60
0 vs. 15	18.63	13.79	4.84	5.997	2	2	0.8071	60
0 vs. 20	18.63	15.4	3.235	5.997	2	2	0.5395	60
0 vs. 25	18.63	20.94	-2.31	5.997	2	2	0.3852	60
MCF-7
0 vs. 0.01	26.47	16.77	9.7	5.997	2	2	1.618	60
0 vs. 0.05	26.47	18.96	7.505	5.997	2	2	1.252	60
0 vs. 0.1	26.47	12.62	13.85	5.997	2	2	2.31	60
0 vs. 0.5	26.47	18.74	7.73	5.997	2	2	1.289	60
0 vs. 1	26.47	12.92	13.55	5.997	2	2	2.259	60
0 vs. 2	26.47	15.98	10.49	5.997	2	2	1.748	60
0 vs. 5	26.47	18.03	8.435	5.997	2	2	1.407	60
0 vs. 10	26.47	22.44	4.03	5.997	2	2	0.672	60
0 vs. 15	26.47	26.87	-0.4	5.997	2	2	0.0667	60
0 vs. 20	26.47	31.2	-4.735	5.997	2	2	0.7896	60
0 vs. 25	26.47	31.84	-5.37	5.997	2	2	0.8955	60
MDA-MB-231
0 vs. 0.01	4.72	11.25	-6.525	5.997	2	2	1.088	60
0 vs. 0.05	4.72	8.725	-4.005	5.997	2	2	0.6679	60
0 vs. 0.1	4.72	5.275	-0.555	5.997	2	2	0.09255	60
0 vs. 0.5	4.72	6.92	-2.2	5.997	2	2	0.3669	60
0 vs. 1	4.72	6.875	-2.155	5.997	2	2	0.3594	60
0 vs. 2	4.72	27.33	-22.61	5.997	2	2	3.77	60
0 vs. 5	4.72	23.03	-18.31	5.997	2	2	3.053	60
0 vs. 10	4.72	42.96	-38.24	5.997	2	2	6.377	60
0 vs. 15	4.72	53.09	-48.37	5.997	2	2	8.065	60
0 vs. 20	4.72	69.15	-64.43	5.997	2	2	10.74	60
0 vs. 25	4.72	63.67	-58.95	5.997	2	2	9.83	60
MDA-MB-468
0 vs. 0.01	18.37	8.505	9.865	5.997	2	2	1.645	60
0 vs. 0.05	18.37	12.44	5.93	5.997	2	2	0.9889	60
0 vs. 0.1	18.37	12.49	5.88	5.997	2	2	0.9805	60
0 vs. 0.5	18.37	12.01	6.365	5.997	2	2	1.061	60
0 vs. 1	18.37	15.68	2.69	5.997	2	2	0.4486	60
0 vs. 2	18.37	47.41	-29.04	5.997	2	2	4.843	60
0 vs. 5	18.37	53.39	-35.02	5.997	2	2	5.839	60
0 vs. 10	18.37	70.96	-52.59	5.997	2	2	8.769	60
0 vs. 15	18.37	71.85	-53.48	5.997	2	2	8.917	60
0 vs. 20	18.37	74.33	-55.96	5.997	2	2	9.332	60
0 vs. 25	18.37	63.56	-45.19	5.997	2	2	7.536	60
SKBR3
0 vs. 0.01	24.55	7.865	16.68	5.997	2	2	2.782	60
0 vs. 0.05	24.55	7.95	16.6	5.997	2	2	2.767	60
0 vs. 0.1	24.55	8.26	16.29	5.997	2	2	2.716	60
0 vs. 0.5	24.55	9.265	15.28	5.997	2	2	2.548	60
0 vs. 1	24.55	10.59	13.96	5.997	2	2	2.327	60
0 vs. 2	24.55	27.53	-2.98	5.997	2	2	0.4969	60
0 vs. 5	24.55	18.08	6.47	5.997	2	2	1.079	60
0 vs. 10	24.55	11.96	12.59	5.997	2	2	2.099	60
0 vs. 15	24.55	12.66	11.89	5.997	2	2	1.982	60
0 vs. 20	24.55	12.46	12.09	5.997	2	2	2.016	60
0 vs. 25	24.55	12.47	12.08	5.997	2	2	2.014	60

## Sheet: Sheet3
Proliferation 24 h
Within each row, compare columns (simple effects within rows)
Number of families	5
Number of comparisons per family	11
Alpha	0.05
Dunnett's multiple comparisons test	Mean Diff.	95.00% CI of diff.	Significant?	Summary	Adjusted P Value
BT-474
0 vs. 0.01	-769.5	-8882 to 7343	No	ns	0.9996
0 vs. 0.05	1821	-6291 to 9933	No	ns	0.9963
0 vs. 0.1	1788	-6324 to 9900	No	ns	0.9964
0 vs. 0.5	1224	-6888 to 9336	No	ns	0.9994
0 vs. 1	1764	-6348 to 9876	No	ns	0.999
0 vs. 2	2439	-5673 to 10551	No	ns	0.9808
0 vs. 5	3526	-4587 to 11638	No	ns	0.8334
0 vs. 10	3866	-4246 to 11978	No	ns	0.7546
0 vs. 15	3846	-4266 to 11958	No	ns	0.7593
0 vs. 20	4769	-3343 to 12881	No	ns	0.5217
0 vs. 25	5233	-2880 to 13345	No	ns	0.4104
MCF-7
0 vs. 0.01	734	-7378 to 8846	No	ns	0.9997
0 vs. 0.05	2477	-5635 to 10589	No	ns	0.9784
0 vs. 0.1	1823	-6290 to 9935	No	ns	0.9963
0 vs. 0.5	1858	-6254 to 9970	No	ns	0.9961
0 vs. 1	5907	-2205 to 14019	No	ns	0.2745
0 vs. 2	5877	-2235 to 13989	No	ns	0.2798
0 vs. 5	7251	-860.7 to 15363	No	ns	0.104
0 vs. 10	7075	-1037 to 15187	No	ns	0.1195
0 vs. 15	7216	-896.1 to 15328	No	ns	0.1069
0 vs. 20	9481	1369 to 17593	Yes	*	0.0132
0 vs. 25	10661	2549 to 18773	Yes	**	0.0036
MDA-MB-231
0 vs. 0.01	3308	-4804 to 11420	No	ns	0.8766
0 vs. 0.05	5430	-2682 to 13542	No	ns	0.367
0 vs. 0.1	4802	-3310 to 12914	No	ns	0.5134
0 vs. 0.5	5738	-2374 to 13850	No	ns	0.3052
0 vs. 1	5708	-2404 to 13821	No	ns	0.3108
0 vs. 2	8579	467.3 to 16691	Yes	*	0.0324
0 vs. 5	8529	417.2 to 16641	Yes	*	0.034
0 vs. 10	9842	1730 to 17954	Yes	**	0.009
0 vs. 15	9950	1838 to 18062	Yes	**	0.008
0 vs. 20	10508	2396 to 18620	Yes	**	0.0043
0 vs. 25	11794	3682 to 19906	Yes	***	0.0009
MDA-MB-468
0 vs. 0.01	11123	3011 to 19235	Yes	**	0.0021
0 vs. 0.05	6819	-1294 to 14931	No	ns	0.1455
0 vs. 0.1	9303	1191 to 17415	Yes	*	0.0159
0 vs. 0.5	10239	2127 to 18351	Yes	**	0.0058
0 vs. 1	17729	9616 to 25841	Yes	****	0.0001
0 vs. 2	17691	9579 to 25803	Yes	****	0.0001
0 vs. 5	17712	9600 to 25824	Yes	****	0.0001
0 vs. 10	16188	8076 to 24300	Yes	****	0.0001
0 vs. 15	16261	8149 to 24374	Yes	****	0.0001
0 vs. 20	16347	8235 to 24459	Yes	****	0.0001
0 vs. 25	17888	9776 to 26000	Yes	****	0.0001
SKBR3
0 vs. 0.01	2944	-5168 to 11056	No	ns	0.9342
0 vs. 0.05	1853	-6259 to 9966	No	ns	0.9961
0 vs. 0.1	2400	-5712 to 10512	No	ns	0.9829
0 vs. 0.5	2004	-6108 to 10116	No	ns	0.9928
0 vs. 1	4691	-3421 to 12803	No	ns	0.5415
0 vs. 2	6064	-2048 to 14176	No	ns	0.2479
0 vs. 5	7412	-700 to 15524	No	ns	0.0913
0 vs. 10	7654	-457.6 to 15767	No	ns	0.0745
0 vs. 15	8625	513 to 16737	Yes	*	0.0311
0 vs. 20	9974	1862 to 18086	Yes	**	0.0078
0 vs. 25	10734	2622 to 18846	Yes	**	0.0033
Test details	Mean 1	Mean 2	Mean Diff.	SE of diff.	N1	N2	q	DF
BT-474
0 vs. 0.01	27963	28732	-769.5	2912	3	3	0.2643	120
0 vs. 0.05	27963	26142	1821	2912	3	3	0.6255	120
0 vs. 0.1	27963	26174	1788	2912	3	3	0.6143	120
0 vs. 0.5	27963	26739	1224	2912	3	3	0.4205	120
0 vs. 1	27963	26199	1764	2912	3	3	0.6059	120
0 vs. 2	27963	25524	2439	2912	3	3	0.8378	120
0 vs. 5	27963	24437	3526	2912	3	3	1.211	120
0 vs. 10	27963	24097	3866	2912	3	3	1.328	120
0 vs. 15	27963	24117	3846	2912	3	3	1.321	120
0 vs. 20	27963	23194	4769	2912	3	3	1.638	120
0 vs. 25	27963	22730	5233	2912	3	3	1.797	120
MCF-7
0 vs. 0.01	36568	35834	734	2912	3	3	0.2521	120
0 vs. 0.05	36568	34091	2477	2912	3	3	0.8507	120
0 vs. 0.1	36568	34745	1823	2912	3	3	0.626	120
0 vs. 0.5	36568	34709	1858	2912	3	3	0.6383	120
0 vs. 1	36568	30661	5907	2912	3	3	2.029	120
0 vs. 2	36568	30691	5877	2912	3	3	2.018	120
0 vs. 5	36568	29316	7251	2912	3	3	2.491	120
0 vs. 10	36568	29492	7075	2912	3	3	2.43	120
0 vs. 15	36568	29352	7216	2912	3	3	2.478	120
0 vs. 20	36568	27087	9481	2912	3	3	3.256	120
0 vs. 25	36568	25907	10661	2912	3	3	3.662	120
MDA-MB-231
0 vs. 0.01	39786	36478	3308	2912	3	3	1.136	120
0 vs. 0.05	39786	34356	5430	2912	3	3	1.865	120
0 vs. 0.1	39786	34984	4802	2912	3	3	1.649	120
0 vs. 0.5	39786	34048	5738	2912	3	3	1.971	120
0 vs. 1	39786	34078	5708	2912	3	3	1.961	120
0 vs. 2	39786	31207	8579	2912	3	3	2.947	120
0 vs. 5	39786	31257	8529	2912	3	3	2.93	120
0 vs. 10	39786	29944	9842	2912	3	3	3.38	120
0 vs. 15	39786	29836	9950	2912	3	3	3.417	120
0 vs. 20	39786	29278	10508	2912	3	3	3.609	120
0 vs. 25	39786	27992	11794	2912	3	3	4.051	120
MDA-MB-468
0 vs. 0.01	30532	19409	11123	2912	3	3	3.82	120
0 vs. 0.05	30532	23713	6819	2912	3	3	2.342	120
0 vs. 0.1	30532	21229	9303	2912	3	3	3.195	120
0 vs. 0.5	30532	20292	10239	2912	3	3	3.517	120
0 vs. 1	30532	12803	17729	2912	3	3	6.089	120
0 vs. 2	30532	12840	17691	2912	3	3	6.076	120
0 vs. 5	30532	12819	17712	2912	3	3	6.084	120
0 vs. 10	30532	14343	16188	2912	3	3	5.56	120
0 vs. 15	30532	14270	16261	2912	3	3	5.585	120
0 vs. 20	30532	14184	16347	2912	3	3	5.615	120
0 vs. 25	30532	12643	17888	2912	3	3	6.144	120
SKBR3
0 vs. 0.01	34558	31614	2944	2912	3	3	1.011	120
0 vs. 0.05	34558	32704	1853	2912	3	3	0.6366	120
0 vs. 0.1	34558	32157	2400	2912	3	3	0.8244	120
0 vs. 0.5	34558	32554	2004	2912	3	3	0.6883	120
0 vs. 1	34558	29866	4691	2912	3	3	1.611	120
0 vs. 2	34558	28494	6064	2912	3	3	2.083	120
0 vs. 5	34558	27146	7412	2912	3	3	2.546	120
0 vs. 10	34558	26903	7654	2912	3	3	2.629	120
0 vs. 15	34558	25933	8625	2912	3	3	2.962	120
0 vs. 20	34558	24584	9974	2912	3	3	3.426	120
0 vs. 25	34558	23824	10734	2912	3	3	3.687	120

## Sheet: Sheet4
Proliferation 48 h
Within each row, compare columns (simple effects within rows)
Number of families	5
Number of comparisons per family	11
Alpha	0.05
Dunnett's multiple comparisons test	Mean Diff.	95.00% CI of diff.	Significant?	Summary	Adjusted P Value
BT-474
0 vs. 0.01	1925	-5247 to 9098	No	ns	0.9907
0 vs. 0.05	2635	-4537 to 9808	No	ns	0.9293
0 vs. 0.1	3236	-3937 to 10409	No	ns	0.8037
0 vs. 0.5	3514	-3659 to 10687	No	ns	0.7275
0 vs. 1	4151	-3021 to 11324	No	ns	0.5405
0 vs. 2	5456	-1717 to 12628	No	ns	0.2309
0 vs. 5	8607	1435 to 15780	Yes	*	0.0101
0 vs. 10	8728	1555 to 15900	Yes	**	0.0087
0 vs. 15	10602	3430 to 17775	Yes	***	0.0007
0 vs. 20	11597	4424 to 18769	Yes	***	0.0002
0 vs. 25	13596	6423 to 20769	Yes	****	0.0001
MCF-7
0 vs. 0.01	8351	1178 to 15524	Yes	*	0.0137
0 vs. 0.05	7581	408 to 14753	Yes	*	0.0326
0 vs. 0.1	9799	2627 to 16972	Yes	**	0.0022
0 vs. 0.5	9609	2436 to 16782	Yes	**	0.0028
0 vs. 1	11668	4495 to 18840	Yes	***	0.0002
0 vs. 2	13852	6679 to 21025	Yes	****	0.0001
0 vs. 5	13834	6661 to 21007	Yes	****	0.0001
0 vs. 10	15831	8658 to 23003	Yes	****	0.0001
0 vs. 15	17316	10144 to 24489	Yes	****	0.0001
0 vs. 20	16721	9548 to 23894	Yes	****	0.0001
0 vs. 25	19821	12648 to 26993	Yes	****	0.0001
MDA-MB-231
0 vs. 0.01	446.9	-6726 to 7620	No	ns	0.9997
0 vs. 0.05	1940	-5233 to 9112	No	ns	0.9904
0 vs. 0.1	2040	-5133 to 9213	No	ns	0.9875
0 vs. 0.5	6794	-378.8 to 13967	No	ns	0.0727
0 vs. 1	9979	2806 to 17151	Yes	**	0.0017
0 vs. 2	11734	4561 to 18907	Yes	***	0.0001
0 vs. 5	15197	8024 to 22369	Yes	****	0.0001
0 vs. 10	16972	9799 to 24144	Yes	****	0.0001
0 vs. 15	21025	13852 to 28198	Yes	****	0.0001
0 vs. 20	24350	17177 to 31522	Yes	****	0.0001
0 vs. 25	27790	20617 to 34962	Yes	****	0.0001
MDA-MB-468
0 vs. 0.01	577.4	-6595 to 7750	No	ns	0.9997
0 vs. 0.05	2569	-4603 to 9742	No	ns	0.939
0 vs. 0.1	3798	-3375 to 10970	No	ns	0.6447
0 vs. 0.5	11266	4093 to 18439	Yes	***	0.0003
0 vs. 1	10983	3810 to 18156	Yes	***	0.0004
0 vs. 2	11518	4345 to 18691	Yes	***	0.0002
0 vs. 5	12809	5637 to 19982	Yes	****	0.0001
0 vs. 10	16025	8853 to 23198	Yes	****	0.0001
0 vs. 15	13440	6267 to 20613	Yes	****	0.0001
0 vs. 20	15682	8509 to 22855	Yes	****	0.0001
0 vs. 25	15274	8102 to 22447	Yes	****	0.0001
SKBR3
0 vs. 0.01	1587	-5586 to 8760	No	ns	0.9963
0 vs. 0.05	-1596	-8769 to 5576	No	ns	0.9963
0 vs. 0.1	4664	-2509 to 11837	No	ns	0.4009
0 vs. 0.5	10067	2894 to 17239	Yes	**	0.0015
0 vs. 1	4612	-2560 to 11785	No	ns	0.4141
0 vs. 2	4535	-2638 to 11708	No	ns	0.4341
0 vs. 5	6190	-983 to 13362	No	ns	0.1267
0 vs. 10	7693	520.5 to 14866	Yes	*	0.0289
0 vs. 15	8437	1264 to 15610	Yes	*	0.0124
0 vs. 20	8404	1232 to 15577	Yes	*	0.0129
0 vs. 25	8498	1325 to 15671	Yes	*	0.0115
Test details	Mean 1	Mean 2	Mean Diff.	SE of diff.	N1	N2	q	DF
BT-474
0 vs. 0.01	31632	29707	1925	2574	3	3	0.7479	120
0 vs. 0.05	31632	28997	2635	2574	3	3	1.024	120
0 vs. 0.1	31632	28396	3236	2574	3	3	1.257	120
0 vs. 0.5	31632	28118	3514	2574	3	3	1.365	120
0 vs. 1	31632	27481	4151	2574	3	3	1.613	120
0 vs. 2	31632	26176	5456	2574	3	3	2.119	120
0 vs. 5	31632	23025	8607	2574	3	3	3.343	120
0 vs. 10	31632	22904	8728	2574	3	3	3.39	120
0 vs. 15	31632	21030	10602	2574	3	3	4.118	120
0 vs. 20	31632	20035	11597	2574	3	3	4.505	120
0 vs. 25	31632	18036	13596	2574	3	3	5.281	120
MCF-7
0 vs. 0.01	34677	26326	8351	2574	3	3	3.244	120
0 vs. 0.05	34677	27096	7581	2574	3	3	2.945	120
0 vs. 0.1	34677	24878	9799	2574	3	3	3.806	120
0 vs. 0.5	34677	25068	9609	2574	3	3	3.733	120
0 vs. 1	34677	23009	11668	2574	3	3	4.532	120
0 vs. 2	34677	20825	13852	2574	3	3	5.381	120
0 vs. 5	34677	20843	13834	2574	3	3	5.374	120
0 vs. 10	34677	18846	15831	2574	3	3	6.149	120
0 vs. 15	34677	17360	17316	2574	3	3	6.726	120
0 vs. 20	34677	17956	16721	2574	3	3	6.495	120
0 vs. 25	34677	14856	19821	2574	3	3	7.699	120
MDA-MB-231
0 vs. 0.01	35701	35255	446.9	2574	3	3	0.1736	120
0 vs. 0.05	35701	33762	1940	2574	3	3	0.7535	120
0 vs. 0.1	35701	33662	2040	2574	3	3	0.7924	120
0 vs. 0.5	35701	28908	6794	2574	3	3	2.639	120
0 vs. 1	35701	25723	9979	2574	3	3	3.876	120
0 vs. 2	35701	23967	11734	2574	3	3	4.558	120
0 vs. 5	35701	20505	15197	2574	3	3	5.903	120
0 vs. 10	35701	18730	16972	2574	3	3	6.593	120
0 vs. 15	35701	14676	21025	2574	3	3	8.167	120
0 vs. 20	35701	11352	24350	2574	3	3	9.459	120
0 vs. 25	35701	7912	27790	2574	3	3	10.79	120
MDA-MB-468
0 vs. 0.01	35503	34925	577.4	2574	3	3	0.2243	120
0 vs. 0.05	35503	32933	2569	2574	3	3	0.998	120
0 vs. 0.1	35503	31705	3798	2574	3	3	1.475	120
0 vs. 0.5	35503	24237	11266	2574	3	3	4.376	120
0 vs. 1	35503	24520	10983	2574	3	3	4.266	120
0 vs. 2	35503	23985	11518	2574	3	3	4.474	120
0 vs. 5	35503	22693	12809	2574	3	3	4.976	120
0 vs. 10	35503	19477	16025	2574	3	3	6.225	120
0 vs. 15	35503	22062	13440	2574	3	3	5.221	120
0 vs. 20	35503	19821	15682	2574	3	3	6.092	120
0 vs. 25	35503	20228	15274	2574	3	3	5.933	120
SKBR3
0 vs. 0.01	36003	34416	1587	2574	3	3	0.6165	120
0 vs. 0.05	36003	37599	-1596	2574	3	3	0.62	120
0 vs. 0.1	36003	31339	4664	2574	3	3	1.812	120
0 vs. 0.5	36003	25936	10067	2574	3	3	3.91	120
0 vs. 1	36003	31390	4612	2574	3	3	1.792	120
0 vs. 2	36003	31468	4535	2574	3	3	1.762	120
0 vs. 5	36003	29813	6190	2574	3	3	2.404	120
0 vs. 10	36003	28309	7693	2574	3	3	2.988	120
0 vs. 15	36003	27566	8437	2574	3	3	3.277	120
0 vs. 20	36003	27598	8404	2574	3	3	3.265	120
0 vs. 25	36003	27505	8498	2574	3	3	3.301	120
